# Supplementary material for: The History of Lentil (Lens culinaris subsp. culinaris) Domestication and Spread as Revealed by Genotyping-by-Sequencing of Wild and Landrace Accessions
Source: Front Plant Sci. 2021 Mar 25;12:628439. doi: 10.3389/fpls.2021.628439 (PMC8030269; doi:10.3389/fpls.2021.628439)
Supplement: Supplementary Table 3 — FST (below diagonal) and Nei’s genetic distance (above diagonal) between L. culinaris groups defined in the STRUCTURE K = 4 model. [file Table_3.XLSX]

## Sheet: Folha1
	Group D Orientalis	Group A Culinaris	Group B Culinaris	Group C Culinaris
Group D Orientalis	-	0.0126036	0.0163665	0.018198
Group A Culinaris	0.190996	-	0.0150233	0.010747
Group B Culinaris	0.230661	0.314675	-	0.0151944
Group C Culinaris	0.284538	0.272101	0.359589	-
