# Supplementary material for: The History of Lentil (Lens culinaris subsp. culinaris) Domestication and Spread as Revealed by Genotyping-by-Sequencing of Wild and Landrace Accessions
Source: Front Plant Sci. 2021 Mar 25;12:628439. doi: 10.3389/fpls.2021.628439 (PMC8030269; doi:10.3389/fpls.2021.628439)
Supplement: Supplementary Table 6 — List of accessions used in this study, their source, geographical provenance, species indicated in the passport data, species attribution based on our population structure data, GBS statistics, improvement status and group in STRUCTURE analysis (accessions labeled “Mixed” have less than 40% of proportional membership to any group). [file Table_6.XLSX]

## Sheet: Folha1
AccessionNumber	SeedBank	Species(reclassified)	Species original	Country	Lat	Long	Notes	BiologicalStatus	Code	Raw reads	Adapter clipped reads	Restriction enzyme filtered reads	Quality trimmed reads	Structure_All_K=3	Structure_Lens_culinaris_K=4	Accession URL Link
Blank-P1	-	-	-	-	-	-	-	-	-	13146	13142	13141	10866	-	-	-
Blank-P2	-	-	-	-	-	-	-	-	-	4353	4331	4331	3481	-	-	-
W6 25276	USDA-GRIN	Lens culinaris subsp. culinaris	Lens culinaris subsp. culinaris	Tajikistan	38.0353	71.8636		Landrace	25276	3226036	3226027	3225943	2614604	Dark Blue	A	https://npgsweb.ars-grin.gov/gringlobal/accessiondetail?id=1651837
PI 177442	USDA-GRIN	Lens culinaris subsp. culinaris	Lens culinaris subsp. culinaris	Syria	36.2167	37.166667	Attributed to Alepo	Landrace	177442	2885945	2885931	2885886	2531090	Light Blue	A	https://npgsweb.ars-grin.gov/gringlobal/accessiondetail?id=1153862
PI 181771	USDA-GRIN	Lens culinaris subsp. culinaris	Lens culinaris subsp. culinaris	Lebanon	33.8333	35.9167		Landrace	181771	1731892	1731860	1731836	1492797	Dark Blue	A	https://npgsweb.ars-grin.gov/gringlobal/accessiondetail.aspx?id=1157197
PI 181886	USDA-GRIN	Lens culinaris subsp. culinaris	Lens culinaris subsp. culinaris	Syria	36.2167	37.166667	Attributed to Alepo	Landrace	181886	1951449	1951431	1951415	1690566	Light Blue	B	https://npgsweb.ars-grin.gov/gringlobal/accessiondetail.aspx?id=1157304
PI 185601	USDA-GRIN	Lens culinaris subsp. culinaris	Lens culinaris subsp. culinaris	Egypt	30.0444	31.2358	Attributted to Cairo	Landrace	185601	2342275	2342259	2342231	1990279	Dark Blue	B	https://npgsweb.ars-grin.gov/gringlobal/accessiondetail.aspx?id=1160169
PI 185602	USDA-GRIN	Lens culinaris subsp. culinaris	Lens culinaris subsp. culinaris	Egypt	25.6833	32.65	Attributted to Luxor	Landrace	185602	2710947	2710937	2710902	2311663	Light Blue	Mixed	https://npgsweb.ars-grin.gov/gringlobal/accessiondetail.aspx?id=1160170
PI 193545	USDA-GRIN	Lens culinaris subsp. culinaris	Lens culinaris subsp. culinaris	Ethiopia	9.03	38.74		Landrace	193545	1822115	1822111	1822080	1560508	Light Blue	C	https://npgsweb.ars-grin.gov/gringlobal/accessiondetail.aspx?id=1164630
PI 193548	USDA-GRIN	Lens culinaris subsp. culinaris	Lens culinaris subsp. culinaris	Ethiopia	9.03	38.74		Landrace	193548	1878105	1878103	1878072	1616173	Dark Blue	B	https://npgsweb.ars-grin.gov/gringlobal/accessiondetail.aspx?id=1164633
PI 251248	USDA-GRIN	Lens culinaris subsp. culinaris	Lens culinaris subsp. culinaris	Egypt	26.1667	32.7167		Landrace	251248	2464386	2464382	2464347	2144134	Dark Blue	B	https://npgsweb.ars-grin.gov/gringlobal/accessiondetail.aspx?id=1194121
PI 274300	USDA-GRIN	Lens culinaris subsp. culinaris	Lens culinaris subsp. culinaris	Pakistan, Northern Areas	36.2333	73.4333		Landrace	274300	920861	920859	920847	776737	Dark Blue	A	https://npgsweb.ars-grin.gov/gringlobal/accessiondetail.aspx?id=1205898
PI 280686	USDA-GRIN	Lens culinaris subsp. culinaris	Lens culinaris subsp. culinaris	Egypt	30.0292	31.213056		Landrace	280686	1965638	1965635	1965606	1681597	Dark Blue	B	https://npgsweb.ars-grin.gov/gringlobal/accessiondetail.aspx?id=1208845
PI 283604	USDA-GRIN	Lens culinaris subsp. culinaris	Lens culinaris subsp. culinaris	Portugal	38.5667	-7.9	Attributted to Evora	Unkonwn	283604	2305602	2305593	2305542	1962071	Light Blue	B	https://npgsweb.ars-grin.gov/gringlobal/accessiondetail.aspx?id=1210866
PI 289066	USDA-GRIN	Lens culinaris subsp. culinaris	Lens culinaris subsp. culinaris	Hungary	47.4925	19.051389	Attributted to Budapest	Improved/Breed	289066	2361711	2361709	2361677	2065905	Dark Blue	B	https://npgsweb.ars-grin.gov/gringlobal/accessiondetail.aspx?id=1218721
PI 289069	USDA-GRIN	Lens culinaris subsp. culinaris	Lens culinaris subsp. culinaris	Hungary	47.4925	19.051389	Attributted to Budapest	Improved/Breed	289069	2447904	2447897	2447849	2134167	Light Blue	Mixed	https://npgsweb.ars-grin.gov/gringlobal/accessiondetail.aspx?id=1218724
PI 289070	USDA-GRIN	Lens culinaris subsp. culinaris	Lens culinaris subsp. culinaris	Hungary	47.4925	19.051389	Attributted to Budapest	Improved/Breed	289070	1834409	1834393	1834360	1545383	Light Blue	C	https://npgsweb.ars-grin.gov/gringlobal/accessiondetail.aspx?id=1218725
PI 289071	USDA-GRIN	Lens culinaris subsp. culinaris	Lens culinaris subsp. culinaris	Hungary	47.4925	19.051389	Attributted to Budapest	Improved/Breed	289071	898151	898150	898134	765571	Light Blue	C	https://npgsweb.ars-grin.gov/gringlobal/accessiondetail.aspx?id=1218726
PI 297758	USDA-GRIN	Lens culinaris subsp. culinaris	Lens culinaris subsp. culinaris	Greece	39.6333	22.4167		Landrace	297758	2227706	2227700	2227663	1914939	Light Blue	B	https://npgsweb.ars-grin.gov/gringlobal/accessiondetail.aspx?id=1225029
PI 297765	USDA-GRIN	Lens culinaris subsp. culinaris	Lens culinaris subsp. culinaris	Greece	40.5167	21.2667		Landrace	297765	1749673	1749671	1749639	1517045	Light Blue	A	https://npgsweb.ars-grin.gov/gringlobal/accessiondetail.aspx?id=1225036
PI 297773	USDA-GRIN	Lens culinaris subsp. culinaris	Lens culinaris subsp. culinaris	Greece	38.2333	20.5667		Landrace	297773	2596114	2596109	2596091	2283408	Light Blue	C	https://npgsweb.ars-grin.gov/gringlobal/accessiondetail.aspx?id=1225044
PI 297775	USDA-GRIN	Lens culinaris subsp. culinaris	Lens culinaris subsp. culinaris	Greece	37.5833	22.25		Landrace	297775	2863164	2863149	2863103	2411822	Light Blue	Mixed	https://npgsweb.ars-grin.gov/gringlobal/accessiondetail.aspx?id=1225046
PI 297779	USDA-GRIN	Lens culinaris subsp. culinaris	Lens culinaris subsp. culinaris	Greece	39.6667	20.8333		Landrace	297779	7075162	7075138	7074982	6082853	Light Blue	B	https://npgsweb.ars-grin.gov/gringlobal/accessiondetail.aspx?id=1225050
PI 298357	USDA-GRIN	Lens culinaris subsp. culinaris	Lens culinaris subsp. culinaris	Egypt	30.0444	31.2358	Attributted to Cairo	Landrace	298357	2588746	2588732	2588691	2249491	Mixed	Mixed	https://npgsweb.ars-grin.gov/gringlobal/accessiondetail.aspx?id=1225431
PI 298644	USDA-GRIN	Lens culinaris subsp. culinaris	Lens culinaris subsp. culinaris	Spain	42.75	-1.66667	Attributed to Navarra	Landrace	298644	2229774	2229770	2229740	1943455	Light Blue	Mixed	https://npgsweb.ars-grin.gov/gringlobal/accessiondetail.aspx?id=1225541
PI 298645	USDA-GRIN	Lens culinaris subsp. culinaris	Lens culinaris subsp. culinaris	Spain	41.65	-0.883333	Attributted to Saragoza	Landrace	298645	2649742	2649738	2649706	2309309	Light Blue	Mixed	https://npgsweb.ars-grin.gov/gringlobal/accessiondetail.aspx?id=1225542
PI 298921	USDA-GRIN	Lens culinaris subsp. culinaris	Lens culinaris subsp. culinaris	Italy	40.8167	16.55		Landrace	298921	2507324	2507311	2507283	2128144	Light Blue	A	https://npgsweb.ars-grin.gov/gringlobal/accessiondetail.aspx?id=1225542
PI 298922	USDA-GRIN	Lens culinaris subsp. culinaris	Lens culinaris subsp. culinaris	Italy	41.9	12.5	Attributed to Rome	Landrace	298922	2473690	2473689	2473656	2139003	Light Blue	C	https://npgsweb.ars-grin.gov/gringlobal/accessiondetail.aspx?id=1225806
PI 298923	USDA-GRIN	Lens culinaris subsp. culinaris	Lens culinaris subsp. culinaris	Italy	41.9	12.5	Attributed to Rome	Landrace	298923	2379647	2379614	2379567	2018613	Light Blue	B	https://npgsweb.ars-grin.gov/gringlobal/accessiondetail.aspx?id=1225807
PI 300558	USDA-GRIN	Lens culinaris subsp. culinaris	Lens culinaris subsp. culinaris	Lebanon	33.7833	36		Landrace	300558	2028510	2028498	2028465	1690787	Dark Blue	B	https://npgsweb.ars-grin.gov/gringlobal/accessiondetail.aspx?id=1226721
PI 300559	USDA-GRIN	Lens culinaris subsp. culinaris	Lens culinaris subsp. culinaris	Lebanon	33.9833	36.1833		Landrace	300559	2674529	2674522	2674478	2265179	Dark Blue	B	https://npgsweb.ars-grin.gov/gringlobal/accessiondetail.aspx?id=1226722
PI 300560	USDA-GRIN	Lens culinaris subsp. culinaris	Lens culinaris subsp. culinaris	Lebanon	33.9333	36.1		Landrace	300560	2813000	2812990	2812935	2425860	Dark Blue	B	https://npgsweb.ars-grin.gov/gringlobal/accessiondetail.aspx?id=1226723
PI 300562	USDA-GRIN	Lens culinaris subsp. culinaris	Lens culinaris subsp. culinaris	Lebanon	33.6667	35.5667	Attributted to Beirut	Landrace	300562	2579858	2579834	2579791	2197061	Dark Blue	B	https://npgsweb.ars-grin.gov/gringlobal/accessiondetail.aspx?id=1226725
PI 300564	USDA-GRIN	Lens culinaris subsp. culinaris	Lens culinaris subsp. culinaris	Lebanon	33.9833	36.1833		Landrace	300564	2480791	2480785	2480764	2178839	Mixed	B	https://npgsweb.ars-grin.gov/gringlobal/accessiondetail?id=1226727
PI 308608	USDA-GRIN	Lens culinaris subsp. culinaris	Lens culinaris subsp. culinaris	Syria	36.3725	37.5178		Landrace	308608	2760133	2760101	2760060	2353085	Light Blue	A	https://npgsweb.ars-grin.gov/gringlobal/accessiondetail.aspx?id=1230561
PI 308609	USDA-GRIN	Lens culinaris subsp. culinaris	Lens culinaris subsp. culinaris	Syria	36.3725	37.5178		Landrace	308609	1678791	1678783	1678748	1447956	Light Blue	A	https://npgsweb.ars-grin.gov/gringlobal/accessiondetail.aspx?id=1230562
PI 308610	USDA-GRIN	Lens culinaris subsp. culinaris	Lens culinaris subsp. culinaris	Syria	36.2167	37.166667	Attributed to Alepo	Landrace	308610	2834409	2834383	2834308	2275385	Mixed	A	https://npgsweb.ars-grin.gov/gringlobal/accessiondetail.aspx?id=1230563
PI 308611	USDA-GRIN	Lens culinaris subsp. culinaris	Lens culinaris subsp. culinaris	Syria	36.2167	37.166667	Attributed to Alepo	Landrace	308611	1777123	1776999	1776970	1456035	Dark Blue	A	https://npgsweb.ars-grin.gov/gringlobal/accessiondetail.aspx?id=1230564
PI 320939	USDA-GRIN	Lens culinaris subsp. culinaris	Lens culinaris subsp. culinaris	Tunisia	36.8064	10.1817	Attributted to Tunis	Unknown	320939	975250	975241	975225	799485	Light Blue	B	https://npgsweb.ars-grin.gov/gringlobal/accessiondetail.aspx?id=1238628
PI 320946	USDA-GRIN	Lens culinaris subsp. culinaris	Lens culinaris subsp. culinaris	Israel	31.7031	35.195556	Attributted to Bethleem	Landrace	320946	1712567	1712558	1712522	1366351	Mixed	B	https://npgsweb.ars-grin.gov/gringlobal/accessiondetail.aspx?id=1238635
PI 320950	USDA-GRIN	Lens culinaris subsp. culinaris	Lens culinaris subsp. culinaris	Armenia	40.1833	44.516667	Attributted to Yerevan	Improved/Breed	320950	2033736	2033735	2033700	1631467	Mixed	A	https://npgsweb.ars-grin.gov/gringlobal/accessiondetail.aspx?id=1238639
PI 329159	USDA-GRIN	Lens culinaris subsp. culinaris	Lens culinaris subsp. culinaris	Iran	35.2333	58.4167		Landrace	329159	1948312	1948310	1948276	1569881	Light Blue	Mixed	https://npgsweb.ars-grin.gov/gringlobal/accessiondetail.aspx?id=1244718
PI 329168	USDA-GRIN	Lens culinaris subsp. culinaris	Lens culinaris subsp. culinaris	Iran	35.6	47.0167		Landrace	329168	547852	547832	547821	455155	Light Blue	A	https://npgsweb.ars-grin.gov/gringlobal/accessiondetail.aspx?id=1244727
PI 339265	USDA-GRIN	Lens culinaris subsp. culinaris	Lens culinaris subsp. culinaris	Turkey	39.9086	41.276944		Landrace	339265	474343	474337	474333	386691	Light Blue	Mixed	https://npgsweb.ars-grin.gov/gringlobal/accessiondetail.aspx?id=1252776
PI 339267	USDA-GRIN	Lens culinaris subsp. culinaris	Lens culinaris subsp. culinaris	Turkey	37.15	37.7		Landrace	339267	1670384	1670376	1670352	1386050	Mixed	A	https://npgsweb.ars-grin.gov/gringlobal/accessiondetail.aspx?id=1252778
PI 339270	USDA-GRIN	Lens culinaris subsp. culinaris	Lens culinaris subsp. culinaris	Turkey	39.895	37.7531		Landrace	339270	1795826	1795820	1795800	1424728	Dark Blue	A	https://npgsweb.ars-grin.gov/gringlobal/accessiondetail.aspx?id=1252781
PI 339278	USDA-GRIN	Lens culinaris subsp. culinaris	Lens culinaris subsp. culinaris	Turkey	37.4667	37.2833		Landrace	339278	2080836	2080830	2080802	1685101	Light Blue	A	https://npgsweb.ars-grin.gov/gringlobal/accessiondetail.aspx?id=1252789
PI 339279	USDA-GRIN	Lens culinaris subsp. culinaris	Lens culinaris subsp. culinaris	Turkey	37.4667	37.2833		Landrace	339279	1980369	1980367	1980334	1643947	Mixed	A	https://npgsweb.ars-grin.gov/gringlobal/accessiondetail.aspx?id=1252790
PI 339280	USDA-GRIN	Lens culinaris subsp. culinaris	Lens culinaris subsp. culinaris	Turkey	38.6667	39.1333		Landrace	339280	734358	734343	734328	604359	Dark Blue	A	https://npgsweb.ars-grin.gov/gringlobal/accessiondetail.aspx?id=1252791
PI 339281	USDA-GRIN	Lens culinaris subsp. culinaris	Lens culinaris subsp. culinaris	Turkey	38.1667	29		Landrace	339281	1068818	1068776	1068757	875115	Light Blue	A	https://npgsweb.ars-grin.gov/gringlobal/accessiondetail.aspx?id=1252792
PI 339283	USDA-GRIN	Lens culinaris subsp. culinaris	Lens culinaris subsp. culinaris	Turkey	37.2167	30.3		Landrace	339283	2271974	2271971	2271946	1908681	Dark Blue	A	https://npgsweb.ars-grin.gov/gringlobal/accessiondetail.aspx?id=1252794
PI 339286	USDA-GRIN	Lens culinaris subsp. culinaris	Lens culinaris subsp. culinaris	Turkey	39.5333	30.6333		Landrace	339286	1484567	1484559	1484543	1218296	Light Blue	A	https://npgsweb.ars-grin.gov/gringlobal/accessiondetail.aspx?id=1252797
PI 339289	USDA-GRIN	Lens culinaris subsp. culinaris	Lens culinaris subsp. culinaris	Turkey	39.9667	41.0167		Landrace	339289	2605982	2605979	2605913	2120663	Light Blue	A	https://npgsweb.ars-grin.gov/gringlobal/accessiondetail.aspx?id=1252800
PI 339292	USDA-GRIN	Lens culinaris subsp. culinaris	Lens culinaris subsp. culinaris	Turkey	40.9167	32.0833		Landrace	339292	2327093	2327085	2327040	1868032	Light Blue	A	https://npgsweb.ars-grin.gov/gringlobal/accessiondetail.aspx?id=1252803
PI 339302	USDA-GRIN	Lens culinaris subsp. culinaris	Lens culinaris subsp. culinaris	Turkey	40.35	26.9333		Landrace	339302	2954824	2954817	2954785	2417600	Light Blue	A	https://npgsweb.ars-grin.gov/gringlobal/accessiondetail.aspx?id=1252813
PI 345635	USDA-GRIN	Lens culinaris subsp. culinaris	Lens culinaris subsp. culinaris	Armenia	40.1833	44.516667	Attributted to Yerevan	Improved/Breed	345635	2397430	2397429	2397377	1958762	Mixed	A	https://npgsweb.ars-grin.gov/gringlobal/accessiondetail.aspx?id=1258106
PI 358602	USDA-GRIN	Lens culinaris subsp. culinaris	Lens culinaris subsp. culinaris	Ethiopia	11.5	39.6		Landrace	358602	1330430	1330425	1330400	1083875	Dark Blue	B	https://npgsweb.ars-grin.gov/gringlobal/accessiondetail.aspx?id=1267792
PI 374117	USDA-GRIN	Lens culinaris subsp. culinaris	Lens culinaris subsp. culinaris	Morocco	31.75	-8.25		Unknown	374117	2698648	2698637	2698574	2190487	Light Blue	C	https://npgsweb.ars-grin.gov/gringlobal/accessiondetail.aspx?id=1280201
PI 374119	USDA-GRIN	Lens culinaris subsp. culinaris	Lens culinaris subsp. culinaris	Morocco	31.75	-8.25		Unknown	374119	2226812	2226799	2226765	1829758	Mixed	B	https://npgsweb.ars-grin.gov/gringlobal/accessiondetail.aspx?id=1280203
PI 380892	USDA-GRIN	Lens culinaris subsp. culinaris	Lens culinaris subsp. culinaris	Iran	36.6644	48.4856		Landrace	380892	2504531	2504525	2504481	2046741	Light Blue	A	https://npgsweb.ars-grin.gov/gringlobal/accessiondetail.aspx?id=1285614
PI 420924	USDA-GRIN	Lens culinaris subsp. culinaris	Lens culinaris subsp. culinaris	Jordan	32.1	35.73		Landrace	420924	2398237	2398228	2398178	1968544	Light Blue	B	https://npgsweb.ars-grin.gov/gringlobal/accessiondetail.aspx?id=1317919
PI 420925	USDA-GRIN	Lens culinaris subsp. culinaris	Lens culinaris subsp. culinaris	Jordan	31.0656	35.6961		Landrace	420925	1401146	1401127	1401102	1113280	Dark Blue	B	https://npgsweb.ars-grin.gov/gringlobal/accessiondetail.aspx?id=1317920
PI 420926	USDA-GRIN	Lens culinaris subsp. culinaris	Lens culinaris subsp. culinaris	Jordan	31.0656	35.6961		Landrace	420926	2380871	2380865	2380830	1898988	Mixed	B	https://npgsweb.ars-grin.gov/gringlobal/accessiondetail.aspx?id=1317921
PI 420927	USDA-GRIN	Lens culinaris subsp. culinaris	Lens culinaris subsp. culinaris	Jordan	30.8333	35.6		Landrace	420927	2054060	2054038	2054007	1670469	Dark Blue	B	https://npgsweb.ars-grin.gov/gringlobal/accessiondetail.aspx?id=1317922
PI 426779	USDA-GRIN	Lens culinaris subsp. culinaris	Lens culinaris subsp. culinaris	Pakistan, Punjab	30.45	72.3667		Landrace	426779	1503733	1503730	1503691	1211508	Dark Blue	A	https://npgsweb.ars-grin.gov/gringlobal/accessiondetail.aspx?id=1321864
PI 426806	USDA-GRIN	Lens culinaris subsp. culinaris	Lens culinaris subsp. culinaris	Pakistan, North-West Frontier	34.6175	71.9714		Landrace	426806	1715395	1715386	1715353	1384892	Dark Blue	A	https://npgsweb.ars-grin.gov/gringlobal/accessiondetail.aspx?id=1321864
PI 431610	USDA-GRIN	Lens culinaris subsp. culinaris	Lens culinaris subsp. culinaris	Cyprus	35.1667	33.3667		Landrace	431610	1082108	1082100	1082076	880775	Mixed	A	https://npgsweb.ars-grin.gov/gringlobal/accessiondetail.aspx?id=1326546
PI 431686	USDA-GRIN	Lens culinaris subsp. culinaris	Lens culinaris subsp. culinaris	Iran	35.6892	51.3889	Attributted to Terhan	Landrace	431686	1430478	1430461	1430418	1166665	Dark Blue	A	https://npgsweb.ars-grin.gov/gringlobal/accessiondetail.aspx?id=1326622
PI 431801	USDA-GRIN	Lens culinaris subsp. culinaris	Lens culinaris subsp. culinaris	Iran	32.6447	51.6675	Attributted to Isfhan	Landrace	431801	2156179	2156167	2156120	1762394	Light Blue	A	https://npgsweb.ars-grin.gov/gringlobal/accessiondetail.aspx?id=1326737
PI 431846	USDA-GRIN	Lens culinaris subsp. culinaris	Lens culinaris subsp. culinaris	Iran	33.6667	47	Attributted to Zagros	Landrace	431846	2120584	2120576	2120533	1706805	Mixed	A	https://npgsweb.ars-grin.gov/gringlobal/accessiondetail.aspx?id=1326782
PI 431872	USDA-GRIN	Lens culinaris subsp. culinaris	Lens culinaris subsp. culinaris	Iran	33.6667	47	Attributted to Zagros	Landrace	431872	1888830	1888825	1888783	1534236	Mixed	A	https://npgsweb.ars-grin.gov/gringlobal/accessiondetail.aspx?id=1326808
PI 432144	USDA-GRIN	Lens culinaris subsp. culinaris	Lens culinaris subsp. culinaris	Iran	33.6667	47	Attributted to Zagros	Landrace	432144	2585491	2585489	2585436	2103709	Dark Blue	A	https://npgsweb.ars-grin.gov/gringlobal/accessiondetail.aspx?id=1327080
PI 432194	USDA-GRIN	Lens culinaris subsp. culinaris	Lens culinaris subsp. culinaris	Iran	33.6667	47	Attributted to Zagros	Landrace	432194	2529474	2529470	2529440	2104857	Mixed	A	https://npgsweb.ars-grin.gov/gringlobal/accessiondetail.aspx?id=1327130
PI 472632	USDA-GRIN	Lens culinaris subsp. culinaris	Lens culinaris subsp. culinaris	Cyprus	35.1667	33.3667		Landrace	472632	959784	959769	959744	788812	Light Blue	Mixed	https://npgsweb.ars-grin.gov/gringlobal/accessiondetail?id=1367568
PI 490288	USDA-GRIN	Lens culinaris subsp. culinaris	Lens culinaris subsp. culinaris	France	45.7831	3.0824	Attributted to Clermont Ferrand	Improved/Breed	490288	2106061	2106051	2106015	1723755	Light Blue	C	https://npgsweb.ars-grin.gov/gringlobal/accessiondetail.aspx?id=1367568
PI 490289	USDA-GRIN	Lens culinaris subsp. culinaris	Lens culinaris subsp. culinaris	France	45.7831	3.0824	Attributted to Clermont Ferrand	Improved/Breed	490289	2391028	2391020	2390991	1957660	Light Blue	C	https://npgsweb.ars-grin.gov/gringlobal/accessiondetail.aspx?id=1385225
PI 533693	USDA-GRIN	Lens culinaris subsp. culinaris	Lens culinaris subsp. culinaris	Spain	42.3333	-5.36667		Landrace	533693	1955423	1955419	1955402	1601845	Light Blue	C	https://npgsweb.ars-grin.gov/gringlobal/accessiondetail.aspx?id=1428629
PI 577156	USDA-GRIN	Lens culinaris subsp. culinaris	Lens culinaris subsp. culinaris	Iraq	33.3333	44.3833	Attributted to Baghdad	Landrace	577156	2477473	2477468	2477435	2031219	Dark Blue	A	https://npgsweb.ars-grin.gov/gringlobal/accessiondetail.aspx?id=1472127
PI 577162	USDA-GRIN	Lens culinaris subsp. culinaris	Lens culinaris subsp. culinaris	Iraq	33.3333	44.3833	Attributted to Baghdad	Landrace	577162	2140318	2140315	2140284	1710299	Dark Blue	A	https://npgsweb.ars-grin.gov/gringlobal/accessiondetail.aspx?id=1472133
PI 606548	USDA-GRIN	Lens culinaris subsp. culinaris	Lens culinaris subsp. culinaris	Morocco	33.0667	-7.6		Landrace	606548	2111287	2111286	2111239	1699890	Light Blue	B	https://npgsweb.ars-grin.gov/gringlobal/accessiondetail.aspx?id=1000934
PI 606549	USDA-GRIN	Lens culinaris subsp. culinaris	Lens culinaris subsp. culinaris	Morocco	33.0667	-7.6		Landrace	606549	2810707	2810701	2810633	2267470	Light Blue	B	https://npgsweb.ars-grin.gov/gringlobal/accessiondetail.aspx?id=1000973
PI 606570	USDA-GRIN	Lens culinaris subsp. culinaris	Lens culinaris subsp. culinaris	Iraq	33.3333	44.3833	Attributted to Baghdad	Landrace	606570	2137614	2137608	2137570	1780113	Dark Blue	A	https://npgsweb.ars-grin.gov/gringlobal/accessiondetail.aspx?id=1043385
PI 606589	USDA-GRIN	Lens culinaris subsp. culinaris	Lens culinaris subsp. culinaris	Spain	37.8833	-4.76667		Landrace	606589	2731235	2731233	2731176	2219235	Light Blue	C	https://npgsweb.ars-grin.gov/gringlobal/accessiondetail.aspx?id=1048953
PI 606590	USDA-GRIN	Lens culinaris subsp. culinaris	Lens culinaris subsp. culinaris	Spain	37.8833	-4.76667		Landrace	606590	2123731	2123705	2123671	1670168	Mixed	A	https://npgsweb.ars-grin.gov/gringlobal/accessiondetail.aspx?id=1048960
PI 606604	USDA-GRIN	Lens culinaris subsp. culinaris	Lens culinaris subsp. culinaris	Bulgaria	42.1333	24.9333		Landrace	606604	3034122	3034118	3034078	2451444	Light Blue	C	https://npgsweb.ars-grin.gov/gringlobal/accessiondetail.aspx?id=1053610
PI 606611	USDA-GRIN	Lens culinaris subsp. culinaris	Lens culinaris subsp. culinaris	Romania	47.1667	27.6		Landrace	606611	2644067	2644066	2644025	2157945	Light Blue	C	https://npgsweb.ars-grin.gov/gringlobal/accessiondetail.aspx?id=1053683
PI 606612	USDA-GRIN	Lens culinaris subsp. culinaris	Lens culinaris subsp. culinaris	Bulgaria	42.15	27.0167		Landrace	606612	2391237	2391232	2391171	1962183	Light Blue	C	https://npgsweb.ars-grin.gov/gringlobal/accessiondetail.aspx?id=1053709
PI 606629	USDA-GRIN	Lens culinaris subsp. culinaris	Lens culinaris subsp. culinaris	Bulgaria	43.4167	28.166667		Landrace	606629	2783799	2783785	2783757	2296355	Light Blue	C	https://npgsweb.ars-grin.gov/gringlobal/accessiondetail.aspx?id=1054013
PI 606637	USDA-GRIN	Lens culinaris subsp. culinaris	Lens culinaris subsp. culinaris	Czechoslovakia	50.0833	14.4167	Attributted to Prague	Improved/Breed	606637	2894475	2894464	2894416	2320321	Light Blue	C	https://npgsweb.ars-grin.gov/gringlobal/accessiondetail.aspx?id=1054798
PI 606638	USDA-GRIN	Lens culinaris subsp. culinaris	Lens culinaris subsp. culinaris	Czechoslovakia	50.0833	14.4167	Attributted to Prague	Improved/Breed	606638	2588881	2588867	2588813	2102925	Light Blue	C	https://npgsweb.ars-grin.gov/gringlobal/accessiondetail.aspx?id=1054805
PI 606648	USDA-GRIN	Lens culinaris subsp. culinaris	Lens culinaris subsp. culinaris	Italy	43.7833	11.25	Attributed to Florence	Landrace	606648	2824552	2824536	2824499	2308607	Light Blue	C	https://npgsweb.ars-grin.gov/gringlobal/accessiondetail.aspx?id=1055825
PI 612262	USDA-GRIN	Lens culinaris subsp. culinaris	Lens culinaris subsp. culinaris	Bulgaria	43.8333	25.95		Landrace	612262	2823312	2823304	2823263	2320102	Light Blue	C	https://npgsweb.ars-grin.gov/gringlobal/accessiondetail.aspx?id=1053686
PI 612265	USDA-GRIN	Lens culinaris subsp. culinaris	Lens culinaris subsp. culinaris	Morocco	31.5	-8.08333		Landrace	612265	2860450	2860252	2860220	2368143	Light Blue	C	https://npgsweb.ars-grin.gov/gringlobal/accessiondetail.aspx?id=1056778
PI 612313	USDA-GRIN	Lens culinaris subsp. culinaris	Lens culinaris subsp. culinaris	Saudi Arabia	24.6333	46.716667	Attributed to Rihad	Landrace	612313	2824956	2824938	2824905	2263087	Dark Blue	B	https://npgsweb.ars-grin.gov/gringlobal/accessiondetail.aspx?id=1523749
PI 612314	USDA-GRIN	Lens culinaris subsp. culinaris	Lens culinaris subsp. culinaris	Saudi Arabia	24.6333	46.716667	Attributed to Rihad	Landrace	612314	2867219	2867212	2867163	2351866	Dark Blue	B	https://npgsweb.ars-grin.gov/gringlobal/accessiondetail?id=1523750
PI 633930	USDA-GRIN	Lens culinaris subsp. culinaris	Lens culinaris subsp. culinaris	Bulgaria	43.8167	26.7333		Landrace	633930	2295875	2295863	2295817	1907155	Light Blue	C	https://npgsweb.ars-grin.gov/gringlobal/accessiondetail.aspx?id=1053880
LENS 104	IPK	Lens culinaris subsp. culinaris	Lens culinaris subsp. culinaris	Germany	48.1333	11.566667	Attributted to Munchen	Improved/Breed	LENS-104	2246066	2246032	2245987	1924069	Light Blue	C	https://gbis.ipk-gatersleben.de/gbis2i/faces/pages/detail.jsf?akzessionId=45056
LENS 105	IPK	Lens culinaris subsp. culinaris	Lens culinaris subsp. culinaris	Germany	47.6667	9.183333	Attributted to Konstanz	Improved/Breed	LENS-105	2506673	2506519	2506489	2157081	Light Blue	C	https://gbis.ipk-gatersleben.de/gbis2i/faces/pages/detail.jsf?akzessionId=45057
LENS 107	IPK	Lens culinaris subsp. culinaris	Lens culinaris subsp. culinaris	Russian Federation	53	50	Attributed to Samara	Landrace	LENS-107	2522545	2522534	2522496	2142902	Light Blue	C	https://gbis.ipk-gatersleben.de/gbis2i/faces/pages/detail.jsf?akzessionId=45059
LENS 116	IPK	Lens culinaris subsp. culinaris	Lens culinaris subsp. culinaris	Hungary	47.4925	19.051389	Attributted to Budapest	Landrace	LENS-116	1820167	1820143	1820116	1532854	Light Blue	C	https://gbis.ipk-gatersleben.de/gbis2i/faces/pages/detail.jsf?akzessionId=45068
LENS 131	IPK	Lens culinaris subsp. culinaris	Lens culinaris subsp. culinaris	Russian Federation	55.75	37.6167	Attributted to Moscow	Improved/Breed	LENS-131	2067573	2067570	2067533	1761444	Light Blue	C	https://gbis.ipk-gatersleben.de/gbis2i/faces/pages/detail.jsf?akzessionId=45083
LENS 152	IPK	Lens culinaris subsp. culinaris	Lens culinaris subsp. culinaris	Czechoslovakia	50.0833	14.4167	Attributted to Prague	Landrace	LENS-152	2588694	2588690	2588647	2167173	Light Blue	C	https://gbis.ipk-gatersleben.de/gbis2i/faces/pages/detail.jsf?akzessionId=45104
LENS 153	IPK	Lens culinaris subsp. culinaris	Lens culinaris subsp. culinaris	Czechoslovakia	50.0833	14.4167	Attributted to Prague	Landrace	LENS-153	2401628	2401610	2401570	2074254	Light Blue	C	https://gbis.ipk-gatersleben.de/gbis2i/faces/pages/detail.jsf?akzessionId=45105
LENS 157	IPK	Lens culinaris subsp. culinaris	Lens culinaris subsp. culinaris	Lybia	26.3328	13.4253		Landrace	LENS-157	2189068	2189064	2189028	1854135	Light Blue	C	https://gbis.ipk-gatersleben.de/gbis2i/faces/pages/detail.jsf?akzessionId=45109
LENS 227	IPK	Lens culinaris subsp. culinaris	Lens culinaris subsp. culinaris	Italy	40.6667	16.6		Landrace	LENS-227	1630265	1630262	1630228	1405336	Light Blue	C	https://gbis.ipk-gatersleben.de/gbis2i/faces/pages/detail.jsf?akzessionId=78837
LENS 246	IPK	Lens culinaris subsp. culinaris	Lens culinaris subsp. culinaris	Romania	44.4325	26.1039	Attributed to Bucharest	Landrace	LENS-246	2178828	2178825	2178788	1842585	Light Blue	A	https://gbis.ipk-gatersleben.de/gbis2i/faces/pages/detail.jsf?akzessionId=44605
LENS 248	IPK	Lens culinaris subsp. culinaris	Lens culinaris subsp. culinaris	Georgia	43.0331	42.7		Landrace	LENS-248	1998124	1998118	1998080	1685531	Light Blue	C	https://gbis.ipk-gatersleben.de/gbis2i/faces/pages/detail.jsf?akzessionId=84288
LENS 249	IPK	Lens culinaris subsp. culinaris	Lens culinaris subsp. culinaris	Poland	51.9003	22.6375		Landrace	LENS-249	1394567	1394565	1394541	1197773	Light Blue	C	https://gbis.ipk-gatersleben.de/gbis2i/faces/pages/detail.jsf?akzessionId=82648
LENS 250	IPK	Lens culinaris subsp. culinaris	Lens culinaris subsp. culinaris	Poland	50.9039	23.115		Landrace	LENS-250	2191892	2191878	2191840	1901339	Light Blue	C	https://gbis.ipk-gatersleben.de/gbis2i/faces/pages/detail.jsf?akzessionId=82678
LENS 258	IPK	Lens culinaris subsp. culinaris	Lens culinaris subsp. culinaris	Italy	41.1253	16.8667		Landrace	LENS-258	1210435	1210380	1210359	1033092	Light Blue	A	https://gbis.ipk-gatersleben.de/gbis2i/faces/pages/detail.jsf?akzessionId=78652
LENS 267	IPK	Lens culinaris subsp. culinaris	Lens culinaris subsp. culinaris	Italy	37.9831	15.8664		Landrace	LENS-267	1932530	1932527	1932505	1690827	Light Blue	B	https://gbis.ipk-gatersleben.de/gbis2i/faces/pages/detail.jsf?akzessionId=80418
LENS 286	IPK	Lens culinaris subsp. culinaris	Lens culinaris subsp. culinaris	Italy	35.5097	12.5897		Landrace	LENS-286	2105155	2105146	2105130	1821028	Light Blue	C	https://gbis.ipk-gatersleben.de/gbis2i/faces/pages/detail.jsf?akzessionId=25261
LENS 291	IPK	Lens culinaris subsp. culinaris	Lens culinaris subsp. culinaris	Tunisia	33.3547	10.5053		Landrace	LENS-291	1930876	1930870	1930826	1673358	Light Blue	C	https://gbis.ipk-gatersleben.de/gbis2i/faces/pages/detail.jsf?akzessionId=86345
LENS 322	IPK	Lens culinaris subsp. culinaris	Lens culinaris subsp. culinaris	Portugal	37.1331	-8.96667	Loulé	Landrace	LENS-322	1344916	1344905	1344884	1146492	Light Blue	C	https://gbis.ipk-gatersleben.de/gbis2i/faces/pages/detail.jsf?akzessionId=97795
LENS 527	IPK	Lens culinaris subsp. culinaris	Lens culinaris subsp. culinaris	Yemen	15.8167	44.05		Landrace	LENS-527	2420435	2420429	2420411	2083376	Dark Blue	B	https://gbis.ipk-gatersleben.de/gbis2i/faces/pages/detail.jsf?akzessionId=244819
LENS 549	IPK	Lens culinaris subsp. culinaris	Lens culinaris subsp. culinaris	Tunisia	36.8064	10.1817	Attributted to Tunis	Landrace	LENS-549	2673134	2673122	2673072	2288873	Light Blue	B	https://gbis.ipk-gatersleben.de/gbis2i/faces/pages/detail.jsf?akzessionId=245761
LENS 561	IPK	Lens culinaris subsp. culinaris	Lens culinaris subsp. culinaris	Tunisia	36.8064	10.1817	Attributted to Tunis	Landrace	LENS-561	3190225	3190221	3190188	2749885	Light Blue	B	https://gbis.ipk-gatersleben.de/gbis2i/faces/pages/detail.jsf?akzessionId=245761
LENS 579	IPK	Lens culinaris subsp. culinaris	Lens culinaris subsp. culinaris	Germany	48.17	9.5	Attributted to Tubbingen	Landrace	LENS-579	1023939	1023928	1023921	873360	Light Blue	C	https://gbis.ipk-gatersleben.de/gbis2i/faces/pages/detail.jsf?akzessionId=257547
LENS 61	IPK	Lens culinaris subsp. culinaris	Lens culinaris subsp. culinaris	Greece	37.0831	22.4331		Landrace	LENS-61	1935847	1935813	1935800	1688387	Light Blue	Mixed	https://gbis.ipk-gatersleben.de/gbis2i/faces/pages/detail.jsf?akzessionId=45013
LENS 611	IPK	Lens culinaris subsp. culinaris	Lens culinaris subsp. culinaris	Georgia	43.01	42.7586		Landrace	LENS-611	1447131	1447123	1447100	1237220	Light Blue	C	https://gbis.ipk-gatersleben.de/gbis2i/faces/pages/detail.jsf?akzessionId=1825389
LENS 71	IPK	Lens culinaris subsp. culinaris	Lens culinaris subsp. culinaris	Greece	37.0164	21.9664		Landrace	LENS-71	3177000	3176972	3176934	2559046	Light Blue	C	https://gbis.ipk-gatersleben.de/gbis2i/faces/pages/detail.jsf?akzessionId=45023
LENS 73	IPK	Lens culinaris subsp. culinaris	Lens culinaris subsp. culinaris	Greece	37.984	23.7278	Attributted to Athens	Landrace	LENS-73	1994736	1994720	1994675	1713469	Light Blue	C	https://gbis.ipk-gatersleben.de/gbis2i/faces/pages/detail.jsf?akzessionId=45025
LENS 93	IPK	Lens culinaris subsp. culinaris	Lens culinaris subsp. culinaris	Germany	51.3333	12.3833	Attributted to Leipzig	Landrace	LENS-93	2200325	2200313	2200274	1892738	Light Blue	C	https://gbis.ipk-gatersleben.de/gbis2i/faces/pages/detail.jsf?akzessionId=45045
NGB2387	Nordgen	Lens culinaris subsp. culinaris	Lens culinaris subsp. culinaris	Sweden	57.7	11.9667	Attributted to Gotenburg	Landrace	NGB2387	2024295	2024264	2024230	1590782	Light Blue	C	http://sesto.nordgen.org/sesto/index.php?scp=ngb&thm=sesto&accnumtxt=NGB2387
NGB2567	Nordgen	Lens culinaris subsp. culinaris	Lens culinaris subsp. culinaris	Sweden	57.5	18.55	Attributted to Gotland	Landrace	NGB2567	2276108	2276103	2276055	1848351	Light Blue	C	https://sesto.nordgen.org/sesto/index.php?scp=ngb&thm=sesto&accnumtxt=NGB2567
IG 72873	ICARDA	Lens culinaris subsp. odemensis	Lens culinaris subsp. orientalis	Syria	36.2028	37.0528		Wild	72873	797898	797891	797882	692796	Dark Blue	-	https://grs.icarda.org/accessions/?IG=72873
PI 572361	USDA-GRIN	Lens culinaris subsp. odemensis	Lens culinaris subsp. odemensis	Israel	AttributtedtoJerusalem			Wild	572361	1761204	1761177	1761159	1442911	Dark Blue	-	https://npgsweb.ars-grin.gov/gringlobal/accessiondetail.aspx?id=1467332
PI 572364	USDA-GRIN	Lens culinaris subsp. odemensis	Lens culinaris subsp. odemensis	Turkey	38.0833	28.2333		Wild	572364	1770986	1770951	1770939	1447953	Dark Blue	-	https://npgsweb.ars-grin.gov/gringlobal/accessiondetail.aspx?id=1467332
PI 572371	USDA-GRIN	Lens culinaris subsp. odemensis	Lens culinaris subsp. orientalis	Israel	31.7833	35.2167	Attributted to Jerusalem	Wild	572371	1209637	1209597	1209578	982861	Dark Blue	-	https://npgsweb.ars-grin.gov/gringlobal/accessiondetail.aspx?id=1467342
IG 72639	ICARDA	Lens culinaris subsp. orientalis	Lens culinaris subsp. odemensis	Syria	34.8	36.4111		Wild	72639	2194386	2194374	2194337	1842049	Dark Blue	-	https://grs.icarda.org/accessions/?IG=72639
IG 72673	ICARDA	Lens culinaris subsp. orientalis	Lens culinaris subsp. orientalis	Syria	36.46	36.8092		Wild	72673	1728075	1728059	1728023	1465944	Dark Blue	D	https://grs.icarda.org/accessions/?IG=72673
IG 72699	ICARDA	Lens culinaris subsp. orientalis	Lens culinaris subsp. orientalis	Syria	32.8386	36.605		Wild	72699	4780267	4779449	4779334	3995067	Dark Blue	D	https://grs.icarda.org/accessions/?IG=72699
IG 72715	ICARDA	Lens culinaris subsp. orientalis	Lens culinaris subsp. orientalis	Syria	35.9139	36.4417		Wild	72715	1473766	1473760	1473733	1235461	Dark Blue	D	https://grs.icarda.org/accessions/?IG=72715
IG 72724	ICARDA	Lens culinaris subsp. orientalis	Lens culinaris subsp. orientalis	Turkey	37.5833	36.9333		Wild	72724	1823978	1823968	1823933	1523691	Dark Blue	D	https://grs.icarda.org/accessions/?IG=72724
IG 72813	ICARDA	Lens culinaris subsp. orientalis	Lens culinaris subsp. orientalis	Turkey	37.1333	37.5167		Wild	72813	2355238	2355223	2355182	1991674	Dark Blue	D	https://grs.icarda.org/accessions/?IG=72813
IG 72833	ICARDA	Lens culinaris subsp. orientalis	Lens culinaris subsp. orientalis	Turkey	40.1667	36.5		Wild	72833	2307443	2307440	2307398	1950105	Dark Blue	D	https://grs.icarda.org/accessions/?IG=72833
IG 72835	ICARDA	Lens culinaris subsp. orientalis	Lens culinaris subsp. orientalis	Turkey	37.0833	37.5		Wild	72835	2050749	2050743	2050717	1744437	Dark Blue	D	https://grs.icarda.org/accessions/?IG=72835
IG 72836	ICARDA	Lens culinaris subsp. orientalis	Lens culinaris subsp. orientalis	Turkey	37.55	30.5		Wild	72836	2343302	2343294	2343267	2042875	Dark Blue	D	https://grs.icarda.org/accessions/?IG=72836
IG 72848	ICARDA	Lens culinaris subsp. orientalis	Lens culinaris subsp. orientalis	Jordan	30.3167	35.4833		Wild	72848	1579893	1579886	1579861	1344958	Dark Blue	D	https://grs.icarda.org/accessions/?IG=72848
IG 72849	ICARDA	Lens culinaris subsp. orientalis	Lens culinaris subsp. orientalis	Cyprus	35.1667	33.3667		Wild	72849	1997399	1997396	1997365	1720530	Dark Blue	D	https://grs.icarda.org/accessions/?IG=72849
IG 72854	ICARDA	Lens culinaris subsp. orientalis	Lens culinaris subsp. orientalis	Syria	36.7333	36.95		Wild	72854	1321280	1321272	1321260	1147807	Dark Blue	D	https://grs.icarda.org/accessions/?IG=72854
IG 72872	ICARDA	Lens culinaris subsp. orientalis	Lens culinaris subsp. orientalis	Syria	36.3111	37.4472		Wild	72872	1943298	1943271	1943230	1673906	Dark Blue	D	https://grs.icarda.org/accessions/?IG=72872
IG 72893	ICARDA	Lens culinaris subsp. orientalis	Lens culinaris subsp. orientalis	Syria	33.8139	36.5167		Wild	72893	2018250	2018214	2018195	1758846	Dark Blue	D	https://grs.icarda.org/accessions/?IG=72893
IG 135443	ICARDA	Lens culinaris subsp. orientalis	Lens culinaris subsp. orientalis	Syria	33.7438	36.0982		Wild	135443	1111257	1111251	1111222	934372	Dark Blue	D	https://grs.icarda.org/accessions/?IG=135443
IG 135554	ICARDA	Lens culinaris subsp. orientalis	Lens culinaris subsp. orientalis	Turkemenistan	38.2872	56.2828		Wild	135554	798957	798955	798949	673699	Dark Blue	D	https://grs.icarda.org/accessions/?IG=135554
IG 135570	ICARDA	Lens culinaris subsp. orientalis	Lens culinaris subsp. orientalis	Turkemenistan	38.2381	56.2922		Wild	135570	636309	636300	636289	547383	Dark Blue	D	https://grs.icarda.org/accessions/?IG=135570
IG 136656	ICARDA	Lens culinaris subsp. orientalis	Lens culinaris subsp. orientalis	Turkey	39.9333	32.8667	Attributted to Ankara	Wild	136656	927113	927052	927043	797811	Dark Blue	D	https://grs.icarda.org/accessions/?IG=136656
IG 136658	ICARDA	Lens culinaris subsp. orientalis	Lens culinaris subsp. orientalis	Israel	31.7833	35.2167	Attributted to Jerusalem	Wild	136658	702945	702893	702886	589398	Dark Blue	Mixed	https://grs.icarda.org/accessions/?IG=136658
IG 136663	ICARDA	Lens culinaris subsp. orientalis	Lens culinaris subsp. orientalis	Turkey	37.0667	37.3833		Wild	136663	1327189	1327185	1327157	1132316	Dark Blue	D	https://grs.icarda.org/accessions/?IG=136663
IG 136664	ICARDA	Lens culinaris subsp. orientalis	Lens culinaris subsp. orientalis	Turkey	36.15	36.05		Wild	136664	756970	756920	756911	643685	Dark Blue	D	https://grs.icarda.org/accessions/?IG=136664
IG 136669	ICARDA	Lens culinaris subsp. orientalis	Lens culinaris subsp. orientalis	Turkey	37.3167	40.7667		Wild	136669	1092661	1092642	1092624	929137	Dark Blue	D	https://grs.icarda.org/accessions/?IG=136669
IG 137423	ICARDA	Lens culinaris subsp. orientalis	Lens culinaris subsp. orientalis	Armenia	40.1833	44.5167		Wild	137423	952296	952289	952274	813693	Dark Blue	D	https://grs.icarda.org/accessions/?IG=137423
IG 140891	ICARDA	Lens culinaris subsp. orientalis	Lens culinaris subsp. orientalis	Azerbeijan	40.3	47.7		Wild	140891	851345	851342	851329	727442	Dark Blue	D	https://grs.icarda.org/accessions/?IG=140891
PI 572367	USDA-GRIN	Lens culinaris subsp. orientalis	Lens culinaris subsp. orientalis	Turkey	39.9333	32.8667	Attributted to Ankara	Wild	572367	1569896	1569851	1569829	1278353	Dark Blue	D	https://npgsweb.ars-grin.gov/gringlobal/accessiondetail.aspx?id=1467338
PI 572370	USDA-GRIN	Lens culinaris subsp. orientalis	Lens culinaris subsp. orientalis	Uzbekistan	39.7	66.9833	Attributted to Samarcand	Wild	572370	2372578	2372572	2372504	1908803	Dark Blue	D	https://npgsweb.ars-grin.gov/gringlobal/accessiondetail.aspx?id=1467338
PI 572374	USDA-GRIN	Lens culinaris subsp. orientalis	Lens culinaris subsp. orientalis	Iran	33.6667	47	Attributted to Zagros	Wild	572374	2353302	2353285	2353252	1884077	Dark Blue	-	https://npgsweb.ars-grin.gov/gringlobal/accessiondetail.aspx?id=1467345
PI 572384	USDA-GRIN	Lens culinaris subsp. orientalis	Lens culinaris subsp. orientalis	Turkey	39.9333	32.8667	Attributted to Ankara	Wild	572384	2568440	2568434	2568395	2103727	Dark Blue	D	https://npgsweb.ars-grin.gov/gringlobal/accessiondetail?id=1467345
PI 572386	USDA-GRIN	Lens culinaris subsp. orientalis	Lens culinaris subsp. orientalis	Turkey	37.7639	38.2778		Wild	572386	1910138	1910134	1910098	1485158	Dark Blue	D	https://npgsweb.ars-grin.gov/gringlobal/accessiondetail.aspx?id=1467357
PI 572389	USDA-GRIN	Lens culinaris subsp. orientalis	Lens culinaris subsp. orientalis	Turkey	39.9333	32.8667	Attributted to Ankara	Wild	572389	2443516	2443512	2443471	1959102	Dark Blue	D	https://npgsweb.ars-grin.gov/gringlobal/accessiondetail.aspx?id=1467360
PI 572390	USDA-GRIN	Lens culinaris subsp. orientalis	Lens culinaris subsp. orientalis	Turkey	39.9333	32.8667	Attributted to Ankara	Wild	572390	1882251	1882237	1882210	1548136	Dark Blue	D	https://npgsweb.ars-grin.gov/gringlobal/accessiondetail.aspx?id=1467361
PI 572392	USDA-GRIN	Lens culinaris subsp. orientalis	Lens culinaris subsp. orientalis	Turkey	39.9333	32.8667	Attributted to Ankara	Wild	572392	2612627	2612614	2612571	2146125	Dark Blue	D	https://npgsweb.ars-grin.gov/gringlobal/accessiondetail.aspx?id=1467361
PI 572393	USDA-GRIN	Lens culinaris subsp. orientalis	Lens culinaris subsp. orientalis	Turkey	37.4167	41.3833		Wild	572393	2021667	2021651	2021623	1620630	Dark Blue	D	https://npgsweb.ars-grin.gov/gringlobal/accessiondetail?id=1467364
PI 572396	USDA-GRIN	Lens culinaris subsp. orientalis	Lens culinaris subsp. orientalis	Turkey	39.9333	32.8667	Attributted to Ankara	Wild	572396	997369	997356	997342	787291	Dark Blue	D	https://npgsweb.ars-grin.gov/gringlobal/accessiondetail.aspx?id=1467367
PI 572398	USDA-GRIN	Lens culinaris subsp. orientalis	Lens culinaris subsp. orientalis	Turkey	40.3167	36.5667		Wild	572398	1754951	1754946	1754919	1390871	Mixed	-	https://npgsweb.ars-grin.gov/gringlobal/accessiondetail.aspx?id=1467369
PI 572399	USDA-GRIN	Lens culinaris subsp. orientalis	Lens culinaris subsp. orientalis	Turkey	36.8667	34.1333		Wild	572399	4140816	4140811	4140758	3118956	Dark Blue	-	https://npgsweb.ars-grin.gov/gringlobal/accessiondetail.aspx?id=1467370
PI 572406	USDA-GRIN	Lens culinaris subsp. orientalis	Lens culinaris subsp. orientalis	Turkey	36.3331	33.4133		Wild	572406	2178163	2178158	2178111	1749868	Dark Blue	D	https://npgsweb.ars-grin.gov/gringlobal/accessiondetail.aspx?id=1467377
PI 612249	USDA-GRIN	Lens culinaris subsp. orientalis	Lens culinaris subsp. orientalis	Turkey	38.3833	37.6		Wild	612249	3376387	3375572	3375521	2765291	Light Blue	-	https://npgsweb.ars-grin.gov/gringlobal/accessiondetail.aspx?id=1467361
PI 615669	USDA-GRIN	Lens culinaris subsp. orientalis	Lens culinaris subsp. orientalis	Turkey	37.3667	40.5333		Wild	615669	1608391	1608380	1608349	1276393	Dark Blue	D	https://npgsweb.ars-grin.gov/gringlobal/accessiondetail.aspx?id=1023941
PI 615670	USDA-GRIN	Lens culinaris subsp. orientalis	Lens culinaris subsp. orientalis	Tajikistan	39.4667	68.1		Wild	615670	1365246	1365235	1365209	1075306	Dark Blue	D	https://npgsweb.ars-grin.gov/gringlobal/accessiondetail.aspx?id=1043086
PI 615672	USDA-GRIN	Lens culinaris subsp. orientalis	Lens culinaris subsp. orientalis	Tajikistan	39.4667	67.7333		Wild	615672	798393	798386	798370	641468	Dark Blue	D	https://npgsweb.ars-grin.gov/gringlobal/accessiondetail.aspx?id=1043095
IG 72553	ICARDA	Lens ervoides	Lens nigricans	Spain	37.3333	-2.48333		Wild	72553	1844285	1844280	1844249	1543241	Green	-	https://grs.icarda.org/accessions/?IG=72553
IG 72558	ICARDA	Lens ervoides	Lens culinaris subsp. odemensis	Turkey	39.5667	27.0167		Wild	72558	1459331	1459301	1459277	1253537	Green	-	https://grs.icarda.org/accessions/?IG=72558
IG 72643	ICARDA	Lens ervoides	Lens culinaris subsp. tomentosus	Syria	36.3375	36.8389		Wild	72643	1306777	1306768	1306747	1111921	Green	-	https://grs.icarda.org/accessions/?IG=72643
IG 72650	ICARDA	Lens ervoides	Lens ervoides	Syria	34.9278	36		Wild	72650	1579738	1579718	1579691	1340220	Green	-	https://grs.icarda.org/accessions/?IG=72650
IG 72805	ICARDA	Lens ervoides	Lens culinaris subsp. tomentosus	Turkey	37.75	39.7667		Wild	72805	2090242	2090237	2090216	1807632	Green	-	https://grs.icarda.org/accessions/?IG=72805
IG 72820	ICARDA	Lens ervoides	Lens culinaris subsp. orientalis	Syria	35.6822	36.5328		Wild	72820	734728	734711	734701	624923	Green	-	https://grs.icarda.org/accessions/?IG=72820
IG 72858	ICARDA	Lens ervoides	Lens culinaris subsp. orientalis	Jordan	32.1667	35.8167		Wild	72858	709987	709976	709964	600258	Green	-	https://grs.icarda.org/accessions/?IG=72858
IG 72911	ICARDA	Lens ervoides	Lens ervoides	Lebanon	33.6667	35.5667	Attributted to Beirut	Wild	72911	1429905	1429877	1429863	1246438	Green	-	https://grs.icarda.org/accessions/?IG=72911
IG 140884	ICARDA	Lens ervoides	Lens ervoides	Armenia	40.15	44.05		Wild	140884	903509	903504	903488	769438	Green	-	https://grs.icarda.org/accessions/?IG=140884
PI 572311	USDA-GRIN	Lens ervoides	Lens ervoides	Turkey	36.3	30.15		Wild	572311	1814385	1814383	1814368	1501303	Green	-	https://npgsweb.ars-grin.gov/gringlobal/accessiondetail.aspx?id=1467282
PI 572317	USDA-GRIN	Lens ervoides	Lens ervoides	Italy	40.5919	17.1153		Wild	572317	1098587	1098585	1098566	901112	Green	-	https://npgsweb.ars-grin.gov/gringlobal/accessiondetail.aspx?id=1467288
PI 572318	USDA-GRIN	Lens ervoides	Lens ervoides	Croatia	45.5	15.5539		Wild	572318	1379998	1379998	1379975	1114711	Green	-	https://npgsweb.ars-grin.gov/gringlobal/accessiondetail.aspx?id=1467289
PI 572328	USDA-GRIN	Lens ervoides	Lens ervoides	Bosnia and Herzegovina	43.3433	17.8081		Wild	572328	2089738	2089720	2089700	1720748	Green	-	https://npgsweb.ars-grin.gov/gringlobal/accessiondetail.aspx?id=1467299
PI 572329	USDA-GRIN	Lens ervoides	Lens ervoides	Israel	31.8167	35.0333		Wild	572329	409212	409209	409201	324383	Green	-	https://npgsweb.ars-grin.gov/gringlobal/accessiondetail.aspx?id=1467300
PI 572334	USDA-GRIN	Lens ervoides	Lens ervoides	Turkey	37.62	35.86		Wild	572334	1378814	1378799	1378761	1136369	Green	-	https://npgsweb.ars-grin.gov/gringlobal/accessiondetail.aspx?id=1467305
PI 572335	USDA-GRIN	Lens ervoides	Lens ervoides	Turkey	39.9333	32.8667	Attributted to Ankara	Wild	572335	1309451	1309449	1309421	1065254	Green	-	https://npgsweb.ars-grin.gov/gringlobal/accessiondetail.aspx?id=1467306
PI 572338	USDA-GRIN	Lens ervoides	Lens ervoides	Turkey	37.7167	30.4		Wild	572338	1356614	1356587	1356573	1107914	Green	-	https://npgsweb.ars-grin.gov/gringlobal/accessiondetail.aspx?id=1467309
IG 72536	ICARDA	Lens nigricans	Lens nigricans	Italy	43.3333	10.5		Wild	72536	803635	803573	803558	672275	Mixed	-	https://grs.icarda.org/accessions/?IG=72536
IG 72634	ICARDA	Lens nigricans	Lens nigricans	Turkey	38.2	30.3333		Wild	72634	2258380	2258264	2258215	1939170	Mixed	-	https://grs.icarda.org/accessions/?IG=72634
PI 572348	USDA-GRIN	Lens nigricans	Lens nigricans	Croatia	43.5869	15.9272		Wild	572348	2438356	2438191	2438163	2029332	Mixed	-	https://npgsweb.ars-grin.gov/gringlobal/accessiondetail.aspx?id=1467319
PI 572356	USDA-GRIN	Lens nigricans	Lens nigricans	Spain	37.35	-2.51667		Wild	572356	2196484	2196364	2196309	1788637	Mixed	-	https://npgsweb.ars-grin.gov/gringlobal/accessiondetail.aspx?id=1467327
PI 572359	USDA-GRIN	Lens nigricans	Lens nigricans	Turkey	39.9333	32.8667	Attributted to Ankara	Wild	572359	609295	609269	609256	493874	Mixed	-	https://npgsweb.ars-grin.gov/gringlobal/accessiondetail.aspx?id=1467330
